# Supplementary material for: Dairy Food Intakes, Postpartum Weight Retention, and Risk of Obesity
Source: MDPI journal article supplement (doi:10.3390/nu15010120), 2022-12-27
Supplement: s1 [file s1]

**Table S1. Exclusion Criteria for Weight Change Analysis.**

| <b>Criteria</b>                                                | <b>Exclusions</b> | <b>Remaining N</b> |
|----------------------------------------------------------------|-------------------|--------------------|
| <b>Start with 29,405 singleton livebirth at/after 1991:</b>    |                   | 29,405             |
| Missing pre-pregnant or postpartum weights                     | 7,511             | 21,894             |
| Missing cross-sectional dairy food intakes                     | 2,069             | 19,825             |
| Total dairy intakes $\geq 6$ s/d                               | 214               | 19,611             |
| Missing height                                                 | 17                | 19,594             |
| Missing activity                                               | 150               | 19,444             |
| Missing smoking                                                | 21                | 19,423             |
| Prevalent or incident cancer during follow-up                  | 260               | 19,163             |
| Prevalent or incident CVD during follow-up                     | 94                | 19,069             |
| Prevalent or incident diabetes during follow-up                | 116               | 18,953             |
| Baseline BMI $< 16$ kg/m <sup>2</sup>                          | 5                 | 18,948             |
| Baseline BMI $> 40$ kg/m <sup>2</sup>                          | 140               | 18,808             |
| Age at childbirth $> 50$ years                                 | 18                | 18,790             |
| Postpartum weight gains $>$ top 1%, i.e., 45 lb                | 208               | 18,582             |
| Postpartum weight loss $<$ bottom 1%, i.e., 20 lb              | 206               | 18,376             |
| <b>Final sample size for postpartum weight change analyses</b> |                   | <b>18,376</b>      |

\*We further excluded 1240 prevalent obese subjects for obesity analysis.

**Table S2. Diet and Lifestyle Characteristics of Women in the Postpartum Weight Retention Analysis by Categories of Total Dairy Intake throughout the 4 Years Surrounding Pregnancy<sup>1</sup>.**

|                                       | Total Dairy Intake |                |              |
|---------------------------------------|--------------------|----------------|--------------|
|                                       | 1 s/m              | 1 s/m -< 2 s/w | ≥ 2 s/w      |
| N of live births                      | 3572               | 6189           | 8606         |
|                                       |                    | Mean (SD)      |              |
| Age at birth (years)                  | 35.6 (3.9)         | 35.2 (3.8)     | 34.9 (3.8)   |
| Pre-pregnant BMI (kg/m <sup>2</sup> ) | 23.2 (4.0)         | 23.2 (3.8)     | 23.1 (3.8)   |
| Activity (h/w)                        | 2.3 (2.7)          | 2.4 (2.6)      | 2.5 (2.7)    |
| AHEI score                            | 48.7 (10.9)        | 48.4 (10.5)    | 46.1 (10.0)  |
| Energy intake (kcal/d)                | 1583 (488)         | 1809 (476)     | 2115 (490)   |
| Energy-adj protein (g/d)              | 79.9 (14.5)        | 83 (12.8)      | 88.3 (11.9)  |
| Energy-adj carbohydrate (g/d)         | 233.5 (36.3)       | 232.3 (31.7)   | 232.2 (28.9) |
| Energy-adj total fat (g/d)            | 62.3 (11.7)        | 61.5 (10.8)    | 59.3 (10.5)  |
| Energy-adj trans-fat (g/d)            | 3.3 (1.2)          | 3.1 (1.1)      | 2.9 (0.9)    |
| Energy-adj alcohol (g/d)              | 2.8 (5.5)          | 2.9 (5.2)      | 2.5 (5.0)    |
| Total dairy (s/d)                     | 0.6 (0.3)          | 1.4 (0.3)      | 3.2 (0.9)    |
| Yogurt (s/w)                          | 0.5 (0.8)          | 1.1 (1.4)      | 1.6 (2.1)    |
| Milk (s/d)                            | 0.2 (0.2)          | 0.8 (0.4)      | 2.3 (0.9)    |
| Cheese (s/d)                          | 0.3 (0.2)          | 0.5 (0.3)      | 0.7 (0.6)    |
| Red and processed meat (s/d)          | 0.9 (0.6)          | 0.9 (0.6)      | 1.0 (0.6)    |
| Fruits and vegetables (s/d)           | 3.8 (2.2)          | 4.3 (2.2)      | 4.6 (2.3)    |
| SSB (bottles/d)                       | 1.2 (1.3)          | 1.2 (1.2)      | 1.5 (1.3)    |
| Pre-pregnancy smoker (%)              | 10.4               | 8.5            | 6.2          |
| First birth (%)                       | 29.4               | 28.1           | 23.8         |

Abbreviations: AHEI, alternative healthy eating index 2010; BMI, body mass index; Energy-adj, energy adjusted; SD, standard deviation; SSB, sugar sweetened beverages; s/d, servings per day; s/m, servings per month; s/w, servings per week.

<sup>1</sup> All the dietary variables and activities variables are cross-sectional; only BMI and smoking status are pre-pregnant.
